# Supplementary material for: Characterization of TTN Novex Splicing Variants across Species and the Role of RBM20 in Novex-Specific Exon Splicing
Source: PubMed Central journal article supplement (PMC5852582; doi:10.3390/genes9020086), 2018-02-13
Supplement: genes-09-00086-s001.pdf [file genes-09-00086-s001.pdf]

| <b>Primers for identification of TTN novex 1</b> |                                                               |                         |
|--------------------------------------------------|---------------------------------------------------------------|-------------------------|
| Primer pair                                      | Primer sequence                                               | PCR products sizes (bp) |
| Human P1                                         | E42-F: CCTGGTACAAGGAAGAGCAG<br>E45-R: GCTTGACAGAGGCTGGATGA    | 608                     |
| Human P2                                         | E45-F: AGCCTCTGTCAAGCCTCAG<br>E49-R: GTTCCAGAGCCATTAGGGTT     | 1003                    |
| Pig P1                                           | E42-F: CCTGGTACAAGGAAGAGCAG<br>E45-R: CAGAGGCTGGATGAAGATGGG   | 602                     |
| Pig P2                                           | E45-F: AAAGCCCATCTTCATCCAGC<br>E49-R: CTCTGCTTTACAGACATAGAGAC | 1066                    |
| Mouse P1                                         | E42-F: CCTGGTACAAGGAGGAGCAG<br>E45-R: CAGAGGCTGGATGAAGATGGG   | 602                     |
| Mouse P2                                         | E45-F: AAAGCCCATCTTCATCCAGC<br>E49-R: GACTTATTCTTAGGTGAGCGC   | 767                     |
| Rat P1                                           | E42-F: CCTGGTACAAGGAAGAGCAG<br>E45-R: CAGAGGCTGGATGAAGATGGG   | 602                     |
| Rat P2                                           | E45-F: AAAGCCCATCTTCATCCAGC<br>E49-R: CCAGAGCCGTCAGGATTG      | 1005                    |
| Chicken P1                                       | E42-F: TGGTAAACCTGCCCGCTTCT<br>E45-R: TAGGCTGGATAAAGATGGGC    | 656                     |
| Chicken P2                                       | E45-F: CATGCCTAAACCAGAAATCCA<br>E49-R: TTTCTGCTCGCTTTGACTGG   | 406                     |
| Frog P1                                          | E42-F: CTGCCCCGATTTACTACTGT<br>E45-R: CTTGAAATAGGCTGAGTGAAGAC | 656                     |
| Frog P2                                          | E45-F: TTCACTCAGCCTATTTCAAGC                                  | 389                     |

|                                                  |                                                                |      |
|--------------------------------------------------|----------------------------------------------------------------|------|
|                                                  | E49-R: TTGCTTCGGTAGGATTCTGT                                    |      |
| <b>Primers for identification of TTN novex 2</b> |                                                                |      |
| Human P1                                         | E42-F: CCTGGTACAAGGAAGAGCAG<br>E46-R: CTGCCACTGCCTGGGACTT      | 561  |
| Human P2                                         | E46-F: ACTGTAAAGTGCGGTGACAC<br>E49-R: GTTCCAGAGCCATTAGGGTT     | 974  |
| Pig P1                                           | E42-F: CCTGGTACAAGGAAGAGCAG<br>E46-R: CTGCCACTGCCTGGGACTT      | 561  |
| Pig P2                                           | E46-F: CAGGACCTCTCTGTAAAGTGC<br>E49-R: CTCTGCTTTACAGACATAGAGAC | 1038 |
| Mouse P1                                         | E42-F: CCTGGTACAAGGAGGAGCAG<br>E46-R: AGGACAGGGTGCAGCATG       | 717  |
| Mouse P2                                         | E46-F: CTGCACCCTGTCCTGAGTTA<br>E49-R: GACTTATTCTTAGGTGAGCGC    | 815  |
| Rat P1                                           | E42-F: CCTGGTACAAGGAAGAGCAG<br>E46-R: AGGACAGGGCACGGCATCG      | 705  |
| Rat P2                                           | E46-F: CCGTGCCCTGTCCTGAGTGA<br>E49-R: CCAGAGCCGTCAGGATTG       | 1039 |
| Chicken P1                                       | E42-F: TGGTAAACCTGCCCGTTCT<br>E46-R: TGTAGCTTTCATGGTCAGCC      | 754  |
| Chicken P2                                       | E46-F: CCAGACATCTCAGAGCACC<br>E49-R: TTTCTGCTCGCTTTGACTGG      | 532  |
| Frog P1                                          | E42-F: CCTGCCCCGATTTACTACTGT<br>E46-R: TGTCTTCATGGCTGAGGC      | 729  |
| Frog P2                                          | E46-F: CCTCAGCCATGAAGACAGT<br>E49-R: TTGCTTCGGTAGGATTCTGT      | 491  |

|                                                  |                                                                 |                         |
|--------------------------------------------------|-----------------------------------------------------------------|-------------------------|
| Human P3                                         | E45-F: CCTGGTACAAGGAAGAGCAG<br>E46-R: CTGCCACTGCCTGGGACTT       | 1086                    |
| Pig P3                                           | E45-F: AAAGCCCATCTTCATCCAGC<br>E46-R: CTGCCACTGCCTGGGACTT       | 1302                    |
| Mouse P3                                         | E45-F: AAAGCCCATCTTCATCCAGC<br>E46-R: AGGACAGGGTGCAGCATG        | 1187                    |
| Rat P3                                           | E45-F: AAAGCCCATCTTCATCCAGC<br>E46-R: AGGACAGGGCACGGCATCG       | 1185                    |
| Chicken P3                                       | E45-F: CATGCCTAAACCAGAAATCCA<br>E46-R: TGTAGCTTTCATGGTCAGCC     | 1043                    |
| Frog P3                                          | E45-F: TTCACTCAGCCTATTTCAAGC<br>E46-R: TGTCTTCATGGCTGAGGC       | 1039                    |
| <b>Primers for identification of TTN novex 3</b> |                                                                 |                         |
| Primer pair                                      | Primer sequence                                                 | PCR products sizes (bp) |
| Human                                            | E44-F: AGAAGATGAAGGAACTTACACG<br>E48-R: GGATTTGTGGTCTATGTCTTCAG | 223                     |
| Pig                                              | E44-F: AGCTTTTCCAGAAGATGAAGG<br>E48-R: GCATATCTTTTAGCAGCCATG    | 240                     |
| Mouse                                            | E44-F: AGGACGAGGGAACGTATGC<br>E48-R: CCATCAGGGAGTGGTGGTCTAT     | 225                     |
| Rat                                              | E44-F: CTGAGGACGAAGGAACTTACGC<br>E48-R: CCATCAGGGAGTGGTGGTCTAT  | 228                     |
| Chicken                                          | E44-F: ACTCAGTTTGAAGACACTTACCA<br>E48-R: CTCCAAGACGGACCTACAC    | 297                     |
| Frog                                             | E44-F: GCTGGAAATTGCTGAGGC                                       | 300                     |

|  |                             |  |
|--|-----------------------------|--|
|  | E48-R: GACCAGGAACCTATGGAAGA |  |
|--|-----------------------------|--|

| <b>Primers for RT-PCR of Ttn novex in WT and KO rat</b> |                                                                |                         |
|---------------------------------------------------------|----------------------------------------------------------------|-------------------------|
| Primer pair                                             | Primer sequence                                                | PCR products sizes (bp) |
| Gapdh                                                   | Gapdh-F: AACATCATCCCTGCATCCAC<br>Gapdh-R: CATACTTGGCAGGTTTCTCC | 154                     |
| novex 1                                                 | E44-F: CTGAGGACGAAGGAACTTACGC<br>E45-R: CAGAGGCTGGATGAAGATGGG  | 191                     |
| novex 2                                                 | E44-F: CTGAGGACGAAGGAACTTACGC<br>E46-R: AGGACAGGGCACGGCATCG    | 1351                    |
| novex 3                                                 | E44-F: CTGAGGACGAAGGAACTTACGC<br>E48-R: CCATCAGGGAGTGGTGGTCTAT | 228                     |

| <b>Primers for RT-PCR of TTN novex in human cardiomyopathies</b> |                                                                |                         |
|------------------------------------------------------------------|----------------------------------------------------------------|-------------------------|
| Primer pair                                                      | Primer sequence                                                | PCR products sizes (bp) |
| GAPDH                                                            | GAPDH-F: ACCCACTCCTCCACCTTTGA<br>GAPDH-R: CTCTCCTCTTGTGCTCTTGC | 189                     |
| novex 1                                                          | E44-F: AGAAGATGAAGGAACTTACACG<br>E45-R: GCTTGACAGAGGCTGGATGA   | 186                     |
| novex 2                                                          | E44-F: AGAAGATGAAGGAACTTACACG<br>E46-R: CTGCCACTGCCTGGGACTT    | 149                     |
| novex 3                                                          | E44-F: AGAAGATGAAGGAACTTACACG                                  | 223/321                 |

|  |                                |  |
|--|--------------------------------|--|
|  | E48-R: GGATTTGTGGTCTATGTCTTCAG |  |
|--|--------------------------------|--|

**Table S1. Primer information for RT-PCR**

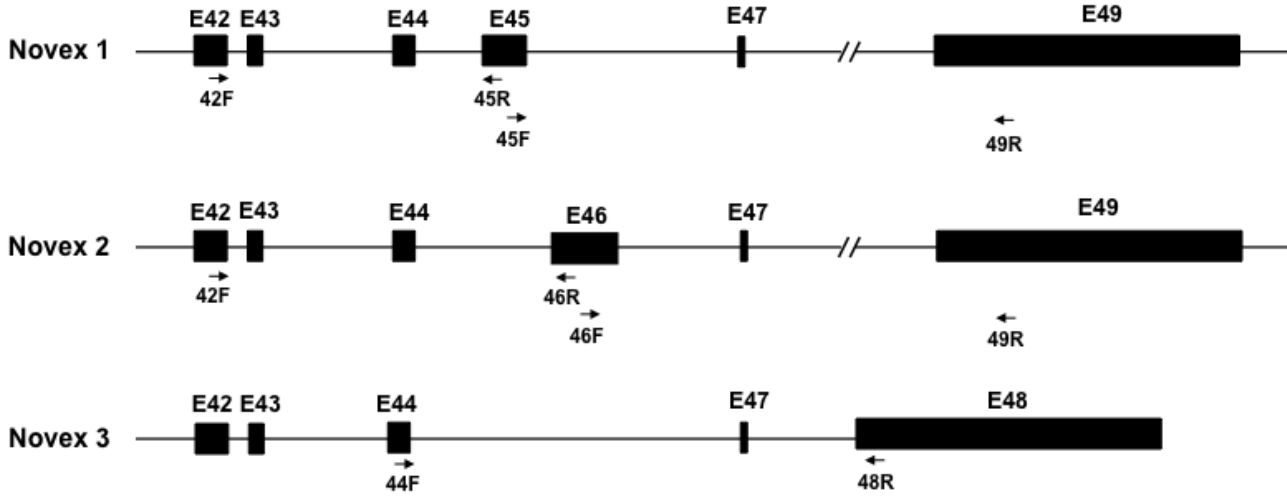

**Figure S1. Primer position spanning novex exons.**

| ID    | Diagnosis   | gender | age | height | weight | BMI  | systolic pressure | diastolic pressure | NYHA | LVEDD (mm) | LVEF (%) | NTproBNP (pg/L) | hsCRP (mg/L) |
|-------|-------------|--------|-----|--------|--------|------|-------------------|--------------------|------|------------|----------|-----------------|--------------|
| N76   | Brain death | male   | 37  | 170    | 60     | 20.8 |                   |                    |      |            |          |                 |              |
| N78   | Brain death | male   | 35  | 175    | 86     | 28.1 |                   |                    |      |            |          |                 |              |
| N72   | Brain death | male   | 28  | 165    | 57     | 20.9 |                   |                    |      |            |          |                 |              |
| N77   | Brain death | female | 38  | 173    | 61     | 20.4 |                   |                    |      |            |          |                 |              |
| N71   | Brain death | male   | 32  | 175    | 59     | 19.3 |                   |                    |      |            |          |                 |              |
| N75   | Brain death | male   | 25  | 173    | 65.0   | 21.7 |                   |                    |      |            |          |                 |              |
| N73   | Brain death | female | 36  | 172    | 75.0   | 25.4 |                   |                    |      |            |          |                 |              |
| N54   | Brain death | male   | 33  | 164    | 55.0   | 20.4 |                   |                    |      |            |          |                 |              |
| H397  | HCM         | female | 44  | 160    | 56.5   | 22.1 | 80                | 50                 | IV   | 7.4        | 14.6     | 2779.9          | 4.18         |
| H0022 | HCM         | male   | 36  | 173    | 69.5   | 23.2 | 90                | 60                 | III  | 6.2        | 23       | 4307.3          | 12.64        |
| H330  | HCM         | female | 54  | 160    | 50.5   | 19.7 | 110               | 70                 | III  | 5.5        | 30       | 1794            | 7.75         |
| H0023 | HCM         | male   | 16  | 164    | 56.0   | 20.8 | 95                | 60                 | III  | 6.6        | 23.0     | 3570.7          |              |
| H388  | HCM         | male   | 40  | 169    | 54.0   | 18.9 | 90                | 60                 | IV   | 8.4        | 22.4     | 3062.4          | 0.02         |
| H438  | HCM         | male   | 19  | 174    | 45.5   | 15.0 | 97                | 65                 | III  | 6.8        | 18.2     | 3282            | 4.84         |
| H167  | HCM         | male   | 56  | 177    | 69.5   | 22.2 | 100               | 60                 | III  | 5.5        | 35.0     | 2733.5          | 1.92         |
| H178  | HCM         | male   | 60  | 164    | 50.5   | 18.8 | 125               | 82                 | III  | 6.9        | 25.2     | 4960.9          | 0.01         |
| D306  | DCM         | male   | 30  | 175    | 58     | 18.9 | 94                | 62                 | IV   | 7.2        | 15       | 1363.8          | 0.16         |
| D217  | DCM         | female | 61  | 162    | 60     | 22.9 | 100               | 65                 | III  | 7.2        | 20       | 7298.5          | 1.96         |
| D302  | DCM         | female | 49  | 162    | 54.5   | 20.8 | 95                | 61                 | IV   | 6.7        | 34.0     | 1429.9          | 1.39         |

|      |      |      |    |     |      |      |     |    |     |     |      |        |       |
|------|------|------|----|-----|------|------|-----|----|-----|-----|------|--------|-------|
| D373 | DCM  | male | 40 | 177 | 63   | 20.1 | 91  | 68 | IV  | 7.4 | 26   | 5729.6 | 13.26 |
| D346 | DCM  | male | 48 | 164 | 49.5 | 18.4 | 96  | 65 | III | 6.2 | 31   | 2276.9 | 3.22  |
| D393 | DCM  | male | 15 | 173 | 54   | 18.0 | 103 | 76 | IV  | 7.6 | 24   | 2074.3 | 0.41  |
| D308 | DCM  | male | 41 | 175 | 59   | 19.3 | 98  | 58 | III | 8.2 | 28   | 2942.7 | 7.06  |
| D119 | DCM  | male | 72 | 172 | 65   | 22.0 | 119 | 89 | III | 5.9 | 37   | 4016.3 | 0.68  |
| A105 | ARVC | male | 43 | 164 | 55.0 | 20.4 | 117 | 70 | II  | 5.0 | 40.0 | 1996.7 | 4.26  |
| A323 | ARVC | male | 36 | 175 | 89.0 | 29.1 | 95  | 64 | IV  | 6.1 | 20.0 | 4563.9 | 7.77  |
| A413 | ARVC | male | 22 | 170 | 82   | 28.4 | 95  | 57 | IV  | 4.7 | 60   | 1106.3 | 12.69 |
| A454 | ARVC | male | 44 | 175 | 61.7 | 20.1 | 98  | 61 | II  | 6.3 | 23.6 | 6179   | 12.69 |

**Table S2, clinical characteristics**
